# Supplementary material for: Comparative whole transcriptome analysis of Parkinson’s disease focusing on the efficacy of zonisamide
Source: HighWire-hosted journal article supplement (doi:10.1136/jnnp-2021-328742), 2022-03-09
Supplement: jnnp-2021-328742supp002_data_supplement.pdf [file jnnp-2021-328742supp002_data_supplement.pdf]

## Supplementary information

### Comparative transcriptome analysis of Parkinson's disease focusing on the efficacy of zonisamide

Naito T et al.

#### Supplementary Note 1. Sample removal in transcriptome data

We initially performed differential gene expression analysis between SRs and NRs for each test set; however, we identified that there was significant enrichment of immune-related genes in the top differentially expressed genes in the pre-treatment samples. We detected that this trend was caused by abnormally high gene expression levels in one sample (**Supplementary Fig. 1**). The abnormally high expressions totally disappeared in the other timing (i.e., post-treatment). Most such genes were reported to be upregulated in viral infection: listed in a previous study of differential gene expression analysis of viral infection (e.g., *ANKRD22*, *AIM2*, *JAK2*, *FCGR1B*, *ZBP1*, *FCGR1A*, *SLC26A8*, and *GLS*),<sup>1</sup> or in GEO signatures of differentially expressed genes for viral infections (e.g., *GBP5*, *PSTPIP2*, *LPCAT2*, *FMNL2*, *SLC26A8*, *DDX60L*, and *GTF2A1*).<sup>2</sup> Therefore, we considered that the sample was likely to be infected with a virus or in some other transient immune active condition and excluded it from subsequent analyses.

**Supplementary Fig. 1. Top differentially expressed genes between SRs and NRs in the pre-treatment samples before sample removal**

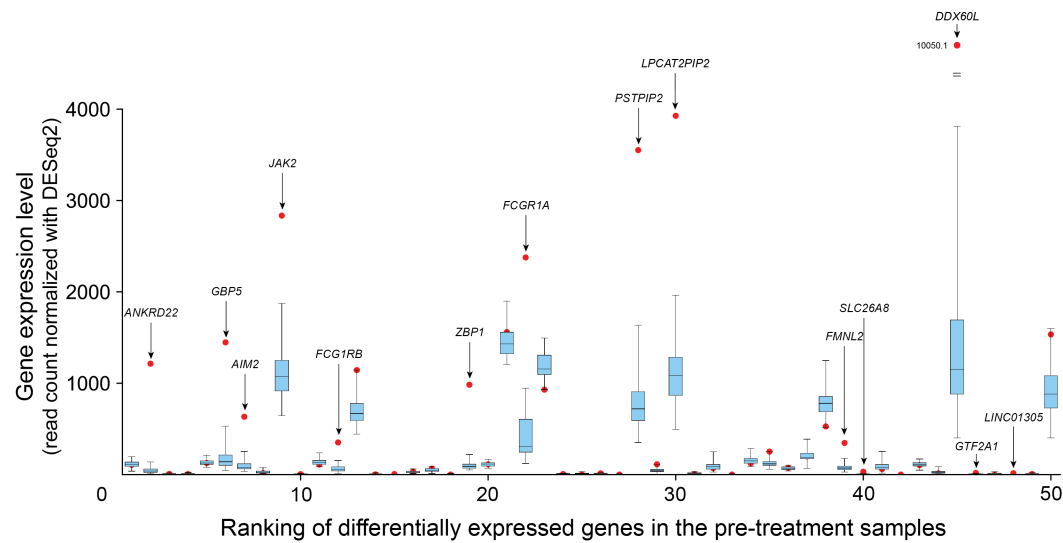

The gene expression levels of top 50 differentially expressed genes between SRs and NRs in the pre-treatment samples are shown in the box plots. For individual genes on the horizontal axis, the lower and upper limits of the boxes represent the maximum and minimum values within  $1.5 \times$  interquartile range from the hinge, respectively, and the top and bottom whiskers represent the 5% and 95% percentiles, respectively. The red dots represent the expression levels of the removed sample. Genes with outlier expression levels in the removed sample were indicated by arrows with the names.

**References**

1. Zarei Ghobadi M, Mozhgani SH, Farzanehpour M, Behzadian F. Identifying novel biomarkers of the pediatric influenza infection by weighted co-expression network analysis. *Viol. J.* 2019;16(1):1–10.
2. Barrett T, Wilhite SE, Ledoux P, et al. NCBI GEO: archive for functional genomics data sets—update. *Nucleic Acids Res.* 2012;41(D1):D991–D995.
